# Supplementary material for: Japanese Honeybees (Apis cerana japonica Radoszkowski, 1877) May Be Resilient to Land Use Change
Source: MDPI journal article supplement (doi:10.3390/insects12080685), 2021-07-30
Supplement: s1 [file s1]

**Table S1.** Pollen collection dates for *Apis cerana japonica* hives in Nagasaki-ken, Japan.

[illegible]

**Table S2.** The land types used to classify vegetation cover across Nagasaki and Saga provinces of Japan. Rural/urban categorisation used to calculate rural-urban ratios are listed. Vegetation classification and original map labels were sourced from vegetation maps freely available from the Japanese Ministry of the Environment's Biodiversity Centre (Ministry of the Environment, Biodiversity Centre, ND).

| Original map label (MAJOR1) | New label | Name (Japanese) | Name (English)                                                                                              | Rural or urban? |
|-----------------------------|-----------|-----------------|-------------------------------------------------------------------------------------------------------------|-----------------|
| 6026                        | 1         | アカガシーミヤマシキミ群集   | Japanese evergreen oak ( <i>Quercus acuta</i> ) and Japanese skimmia ( <i>Skimmia japonica</i> ) crowd      | Rural           |
| 6030                        | 2         | ケヤキ群落           | Japanese elm ( <i>Zelkova serrata</i> ) community                                                           | Rural           |
| 6075                        | 3         | スダジイーヤブコウジ群集    | Itajii chinkapin ( <i>Castanopsis sieboldii</i> ) and marlberry ( <i>Ardisia japonica</i> ) crowd           | Rural           |
| 6078                        | 4         | ミミズバイースダジイ群集    | <i>Symplocos glauca</i> and Itajii chinkapin crowd                                                          | Rural           |
| 6079                        | 5         | スダジイーミミズバイ群集    | Itajii chinkapin and <i>Symplocos glauca</i> population                                                     | Rural           |
| 6087                        | 6         | スダジイーホソバカナワラビ群集 | Itajii chinkapin and <i>Arachniodes exilis</i> crowd                                                        | Rural           |
| 6111                        | 7         | タブームサシアブミ群集     | Cobra lily ( <i>Arisaema ringensi</i> ) crowd                                                               | Rural           |
| 6123                        | 8         | マサキートベラ群集       | Japanese spindle ( <i>Euonymus japonicus</i> ) and Japanese pittosporum ( <i>Pittosporum tobira</i> ) crowd | Rural           |
| 6128                        | 9         | ハマビワーオニヤブソテツ群集  | <i>Litsea japonica</i> (Thunb.) Juss. and Japanese holly fern ( <i>Cyrtomium falcatum</i> ) crowd           | Rural           |
| 7009                        | 10        | クヌギ群落           | Sawtooth oak ( <i>Quercus acutissima</i> ) community                                                        | Rural           |
| 7017                        | 11        | シイ・カシ萌芽林        | Chinquapin ( <i>Castanopsis</i> ) and ring-cupped oak ( <i>Cyclobalanopsis</i> ) species seedling forest    | Rural           |
| 7025                        | 12        | マテバシイーハクサンボク群落  | Japanese stone oak ( <i>Pasania edulis</i> ) and Japanese viburnum ( <i>Viburnum japonicum</i> ) community  | Rural           |
| 7036                        | 13        | 伐跡群落            | Logging community                                                                                           | Rural           |
| 7047                        | 14        | ヤダケーメダケ群落       | Arrow bamboo ( <i>Pseudosasa japonica</i> ) and medake bamboo ( <i>Pleiblastus simonii</i> ) community      | Rural           |
| 7054                        | 15        | ススキ群団           | Maiden silvergrass ( <i>Miscanthus sinensis</i> ) group                                                     | Rural           |
| 7065                        | 16        | ススキーチガヤ群落       | Maiden silvergrass and cogongrass ( <i>Imperata cylindrica</i> ) community                                  | Rural           |
| 7081                        | 17        | アカマツ群落          | Japanese red pine ( <i>Pinus densiflora</i> ) canopy                                                        | Rural           |

|      |    |                     |                                                                                                                                                                  |       |
|------|----|---------------------|------------------------------------------------------------------------------------------------------------------------------------------------------------------|-------|
| 7085 | 18 | アカマツ・ヤマツツジ群集        | Japanese red pine and torch rhododendron ( <i>Rhododendron kaempferi</i> ) crowd                                                                                 | Rural |
| 7088 | 19 | アカマツ・オンツツジ群集        | Japanese red pine and <i>Rhododendron weyrichii</i> var. <i>weyrichii</i> crowd                                                                                  | Rural |
| 7093 | 20 | クロマツ群落              | Japanese black pine ( <i>Pinus thunbergii</i> ) canopy                                                                                                           | Rural |
| 8008 | 21 | ヨシクラス               | Common reed ( <i>Phragmites australis</i> ) class                                                                                                                | Rural |
| 8040 | 22 | 砂丘植生                | Dune vegetation                                                                                                                                                  | Rural |
| 8051 | 23 | ハチジョウススキ群落          | Maiden silvergrass community                                                                                                                                     | Rural |
| 8101 | 24 | ハイビヤクシン群落           | Japanese garden juniper ( <i>Juniperus procumbens</i> ) community                                                                                                | Rural |
| 9016 | 25 | スギ・ヒノキ・サワラ植林        | Japanese cedar ( <i>Cryptomeria japonica</i> ), Japanese cypress ( <i>Chamaecyparis obtusa</i> ) and Sawara cypress ( <i>Chamaecyparis pisifera</i> ) plantation | Rural |
| 9017 | 26 | スギ・ヒノキ植林            | Japanese cedar and Japanese cypress plantation                                                                                                                   | Rural |
| 9032 | 27 | クスノキ植林              | Camphor tree ( <i>Cinnamomum camphora</i> ) plantation                                                                                                           | Rural |
| 9033 | 28 | マテバシイ植林             | Japanese stone oak plantation                                                                                                                                    | Rural |
| 9035 | 29 | 落葉広葉樹植林             | Other plantations (deciduous broad-leaved trees)                                                                                                                 | Rural |
| 9060 | 30 | モウソウチク林             | Moso bamboo ( <i>Phyllostachys edulis</i> ) forest                                                                                                               | Rural |
| 9061 | 31 | マダケ・ハチク林            | Japanese timber bamboo ( <i>Phyllostachys bambusoides</i> ) and white bamboo ( <i>Phyllostachys nigra</i> var. <i>henonis</i> ) forest                           | Rural |
| 9062 | 32 | 常緑果樹園               | Evergreen orchard                                                                                                                                                | Rural |
| 9064 | 33 | 落葉果樹園               | Deciduous orchard                                                                                                                                                | Rural |
| 9068 | 34 | 茶畑                  | Tea plantation                                                                                                                                                   | Rural |
| 9072 | 35 | 畑地雑草群落              | Upland weed community                                                                                                                                            | Rural |
| 9077 | 36 | ヒメムカシヨモギ・オオアレチノギク群落 | Horseweed ( <i>Erigeron canadensis</i> ) and white horseweed ( <i>Conyza sumatrensis</i> ) community                                                             | Rural |
| 9082 | 37 | 牧草地                 | Pasture                                                                                                                                                          | Rural |
| 9090 | 38 | ゴルフ場、飛行場の芝地         | Golf course, airfield turf                                                                                                                                       | Urban |
| 9096 | 39 | ゴルフ場、飛行場            | Golf course, airfield                                                                                                                                            | Urban |
| 9098 | 40 | 水田雑草群落              | Paddy field weed community                                                                                                                                       | Rural |
| 9101 | 41 | 休耕田雑草群落             | Fallow field weed community                                                                                                                                      | Rural |

|      |    |               |                                               |       |
|------|----|---------------|-----------------------------------------------|-------|
| 9902 | 42 | 市街地           | City area                                     | Urban |
| 9905 | 43 | 緑の多い住宅地       | Green residential area                        | Urban |
| 9906 | 44 | 公園、墓地         | Parks, cemeteries                             | Urban |
| 9910 | 45 | 緑の多い住宅地、公園、墓地 | Green residential areas, parks and cemeteries | Urban |
| 9915 | 46 | 工場地帯          | Factory area                                  | Urban |
| 9919 | 47 | 造成地           | Land for development                          | Urban |
| 9927 | 48 | 採石場           | Quarry                                        | Urban |
| 9929 | 49 | 干拓地           | Reclaimed land                                | Urban |
| 9931 | 50 | 開放水域          | Open water                                    | Rural |
| 9933 | 51 | 自然裸地          | Natural bare land                             | Rural |
| 9999 | 52 | 現存植生不明区分      | Existing vegetation unknown                   | Rural |

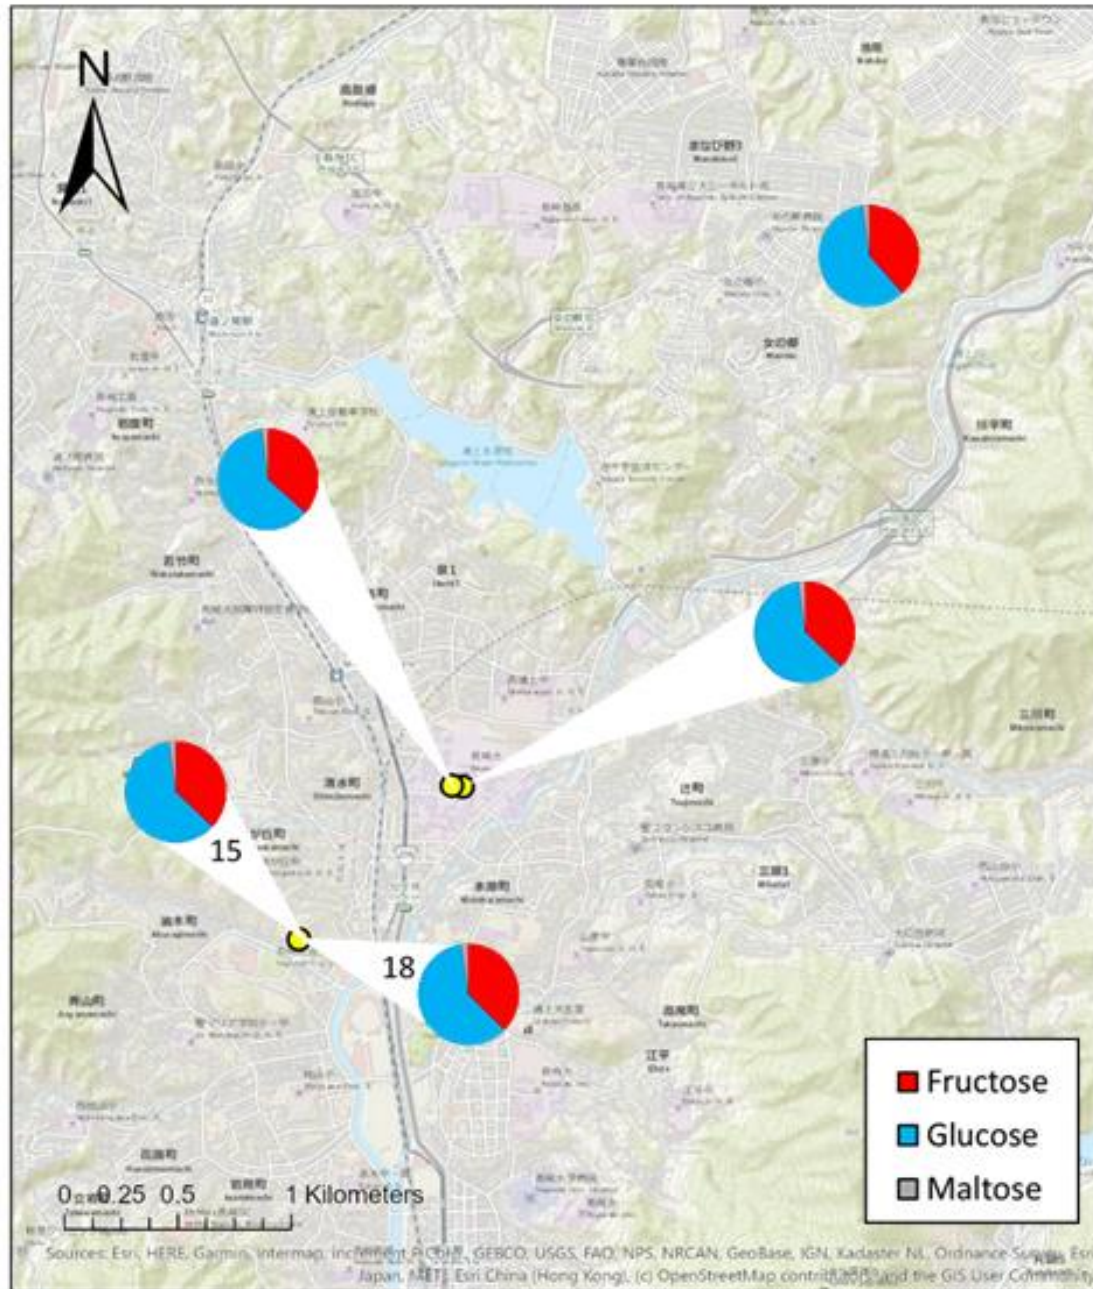

**Figure S1.** Proportion of fructose, maltose and glucose in honey samples collected from five *Apis cerana japonica* hives in Nagasaki, Japan. Yellow dots represent hives where pie chart could not be placed directly in the correct location. Where multiple hives had the same location, pie charts are labelled with hive number. Sugar proportions were calculated using High Performance Liquid Chromatography.



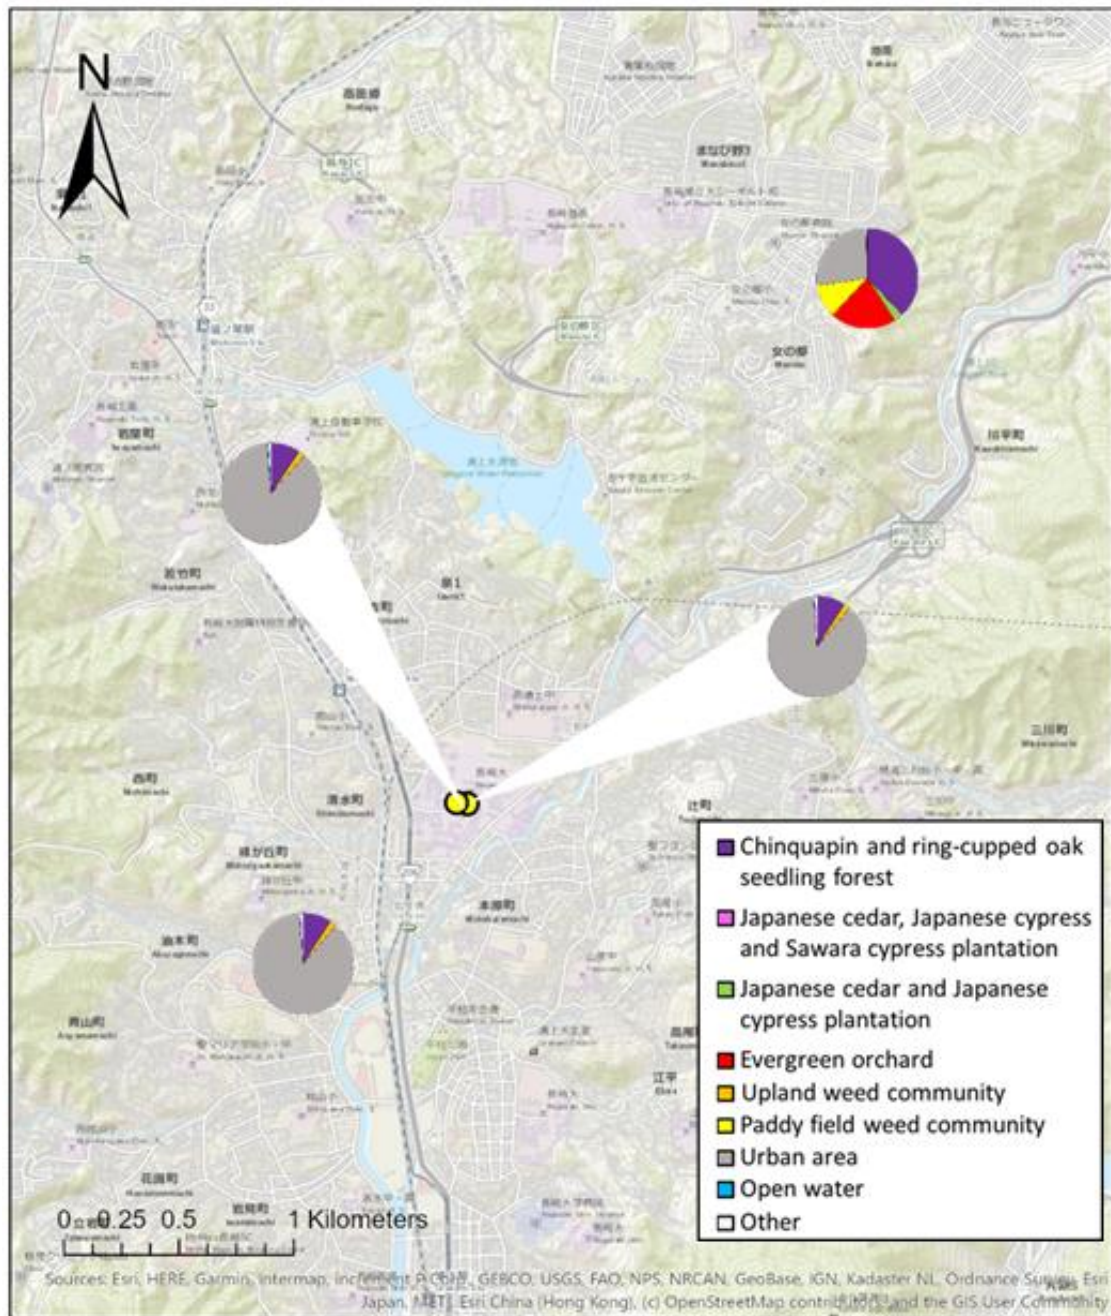

**Figure S2.** Proportion of land uses in a 1 km radius surrounding five *Apis cerana japonica* hives in Nagasaki, Japan. Land uses which were dominant for at least one hive are shown, along with all other land types, grouped into 'other'. Yellow dots represent hives where pie chart could not be placed directly in the correct location. Hives 15 and 18 were located in the same apiary, so are shown using one pie chart. Land use was calculated using vegetation maps freely available from the Japanese Ministry of the Environment's Biodiversity Centre (Ministry of the Environment, Biodiversity Centre, ND).
