# Supplementary material for: Japanese Honeybees (Apis cerana japonica Radoszkowski, 1877) May Be Resilient to Land Use Change
Source: MDPI journal article supplement (doi:10.3390/insects12080685), 2021-07-30
Supplement: s1 [file s1]

## APPENDIX 1

### Pollen biotype identification

Biotype classifications and descriptions used to identify pollen grains found in samples collected from five *Apis cerana japonica* hives in Nagasaki-ken, Japan, between June and September 2019. Potential species names are also given where possible, based on pollen samples collected directly from flowering plants and a palynomorph guide of Japanese flora by Shimakura (1973). Reference images are approximately relatively sized.

| Number | Possible species name(s) | Description                                | Reference Image                                                                       |
|--------|--------------------------|--------------------------------------------|---------------------------------------------------------------------------------------|
| 1      | <i>Aralia elata</i>      | Small, circular/semi-circular              | 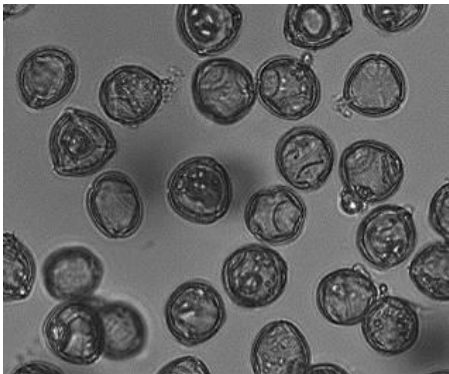   |
| 2      |                          | Large, asymmetrical, pale, slightly dotted |   |
| 3      | <i>Firmiana simplex</i>  | Medium, dark, 3-way symmetry, rounded      |  |

|   |                                                                |                                                                                            |                                                                                                                                                                                                                                                           |
|---|----------------------------------------------------------------|--------------------------------------------------------------------------------------------|-----------------------------------------------------------------------------------------------------------------------------------------------------------------------------------------------------------------------------------------------------------|
| 4 |                                                                | Medium, oval, asymmetrical, dotted. Often burst                                            | 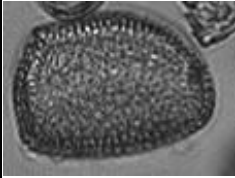   |
| 5 |                                                                | Small, triangular, circles on points                                                       |                                                                                                                                                                        |
| 6 |                                                                | Medium, dark, circular                                                                     |                                                                                                                                                                       |
| 7 |                                                                | Medium-small, 3-way symmetry, semi-angular, internal lines, darkish                        |                                                                                                                                                                      |
| 8 | <i>Abelia</i> (a.k.a. <i>Linnaea</i> )<br>x <i>grandiflora</i> | Medium-small, grainy, dark, circular/semi-circular. Sometimes has three circles on corners |                                                                                                                                                                       |
| 9 | <i>Fraxinus griffithii</i>                                     | Medium-small, circular/semi-circular, darkish, border                                      |                                                                                                                                                                       |

|    |                                                                 |                                                                          |                                                                                                                                                                            |
|----|-----------------------------------------------------------------|--------------------------------------------------------------------------|----------------------------------------------------------------------------------------------------------------------------------------------------------------------------|
| 10 |                                                                 | Very small, light, circular/semi-circular.                               | 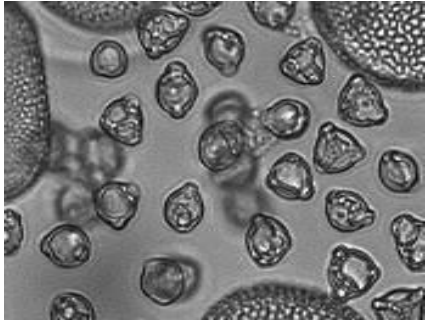                                                                                         |
| 11 |                                                                 | Medium-small, oval, light, lines down. Coffee bean-like. 3-way symmetry. | <br>  |
| 12 | <i>Citrus/Fortunella crassifolia</i><br><i>Firmiana simplex</i> | Like 3, but medium-small, semi-circular.                                 |     |
| 13 | <i>Lagerstroemia indica</i>                                     | Medium, asymmetrical, slightly pointed                                   |                                                                                       |
| 14 |                                                                 | Medium, oblong, slightly pointed at ends, arcing lines through           |   |
| 15 | <i>Trifolium repens</i>                                         | Like 3, but lighter and a bit pointed on sides                           |                                                                                       |

|    |                                                                                                                               |                                                                                                                                           |                                                                                      |
|----|-------------------------------------------------------------------------------------------------------------------------------|-------------------------------------------------------------------------------------------------------------------------------------------|--------------------------------------------------------------------------------------|
| 16 | <i>Dendropanax trifidus</i><br><i>Euonymus japonicus</i>                                                                      | 15, but medium-small                                                                                                                      |   |
| 17 | <i>Lithocarpus edulis</i>                                                                                                     | Small, oval, lines arcing through.                                                                                                        |   |
| 18 |                                                                                                                               | Like 5 but medium, semi-angular.                                                                                                          |   |
| 19 |                                                                                                                               | Medium, semi-circular, darkish middle, light circles on corners                                                                           |   |
| 20 | <i>Mallotus japonicus</i><br><i>Citrus/Fortunella crassifolia</i><br><i>Dendropanax trifidus</i><br><i>Euonymus japonicus</i> | Similar to 16, but more indents, elongated. From end on: small-medium, three rounded sides, triangle inside, with points between indents. |  |
| 21 |                                                                                                                               | Medium-small, circle with triangle inside, or diamond from side on                                                                        |  |

|    |                                           |                                                                                       |                                                                                       |
|----|-------------------------------------------|---------------------------------------------------------------------------------------|---------------------------------------------------------------------------------------|
| 22 | <i>Dendropanax trifidus</i>               | Medium-small, asymmetrical diamond, with internal lines. Sharp triangular from end-on | 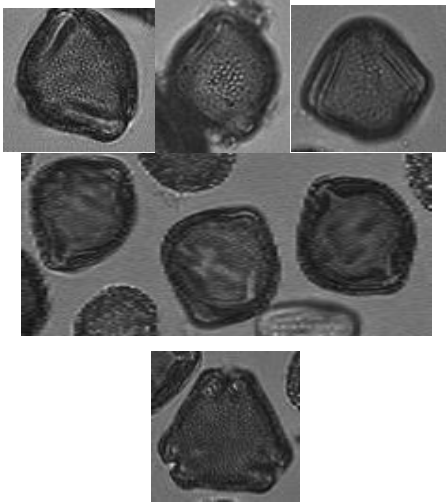    |
| 23 | <i>Vitis ficifolia</i> var. <i>lobata</i> | Small-medium, circular/semi-triangular, border, granular inside                       |    |
| 24 |                                           | Medium, oblong, slightly pointed at sides, lines through with little dents            |  |
| 25 |                                           | Small, pale, simple, oval, internal lines                                             |  |
| 26 |                                           | Medium, very light, cell-like, dotted randomly inside, thin border                    |  |

|    |  |                                                                                       |                                                                                                                                                                             |
|----|--|---------------------------------------------------------------------------------------|-----------------------------------------------------------------------------------------------------------------------------------------------------------------------------|
| 27 |  | Medium, circular, granular, thin border                                               | 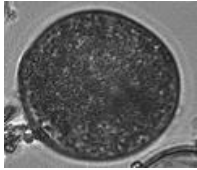                                                                                         |
| 28 |  | Like 27, but small                                                                    |                                                                                          |
| 29 |  | Medium-small, mottled inside, darker wiggly border, circular                          |                                                                                          |
| 30 |  | Medium-small, triangle with concave sides inside, lobed (inter-semiangular)           |                                                                                          |
| 31 |  | Medium-small, semi-circular, Y shape joining indents sometimes visible                |                                                                                         |
| 32 |  | Medium-small, very wiggly outline, darkish                                            |                                                                                        |
| 33 |  | Medium-small, slightly wiggly circular, grainy inside                                 |                                                                                        |
| 34 |  | Like 3, but slightly asymmetrical and lighter. Like 31 (but medium) when seen end-on. |   |

|    |                                 |                                                                                                                    |                                                                                       |
|----|---------------------------------|--------------------------------------------------------------------------------------------------------------------|---------------------------------------------------------------------------------------|
| 35 |                                 | Small-medium, semi-circular, sometimes circles at indents where sides meet. Faint triangle inside joining indents. |    |
| 36 |                                 | Medium, pointed oval, granular and dark inside                                                                     |    |
| 37 | <i>Ternstroemia gymnanthera</i> | Like 20 but small and pale                                                                                         |     |
| 38 |                                 | Small, like 36 but granular inside inner triangle                                                                  |    |
| 39 | <i>Aralia elata</i>             | Small, like 39 but clear Y connecting points                                                                       |  |
| 40 |                                 | Medium-small, pointed oval, lines arcing through                                                                   |  |
| 41 |                                 | Medium-large, dark, granular.                                                                                      |   |

|    |                                                   |                                                 |                                                                                       |
|----|---------------------------------------------------|-------------------------------------------------|---------------------------------------------------------------------------------------|
| 42 |                                                   | Like 26 but very large                          | 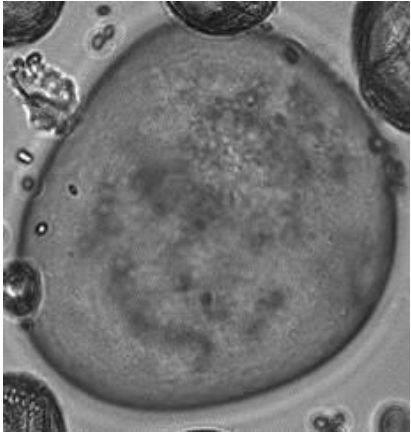    |
| 43 | <i>Tetradium daniellii</i> var. <i>hupehensis</i> | Like 8 but small                                |     |
| 44 |                                                   | Small, light, oval, border, slightly dotted     |  |
| 45 |                                                   | Like 3, but small, trilobate circular           |  |
| 46 |                                                   | Small oval with two circles opposite each other |  |
| 47 |                                                   | Like 20 but medium-small. Darker than 37        |   |
| 48 | <i>Trifolium repens</i>                           | Rounded oval with arcing lines                  |  |
| 49 |                                                   | Pale triangular                                 |  |



|    |  |                                               |                                                                                     |
|----|--|-----------------------------------------------|-------------------------------------------------------------------------------------|
| 50 |  | Semi-circular with sharp<br>indents at points |  |
|----|--|-----------------------------------------------|-------------------------------------------------------------------------------------|
