# Supplementary material for: Japanese Honeybees (Apis cerana japonica Radoszkowski, 1877) May Be Resilient to Land Use Change
Source: Insects. 2021 Jul 30;12(8):685. doi: 10.3390/insects12080685 (PMC8396638; doi:10.3390/insects12080685)
Supplement: Supplementary file 1 [file insects-12-00685-s001.zip › Supplemntary Materials 1 Questionnaire.xlsx]

## Sheet: Sheet1
Sample label	Name	Latitude	Longitude	Location is exact	If no, how accurate?	Experience (years)	Date of sample removal			Box or frame?	cerana or mellifera?	New or pre-existing hive?	Supplementary food given?	If yes, what and when?	Number of hives used in sample	Environment	Comments
							Year	Month	Date
1	Mr Kumabe	33.2123	129.733	Y		15	2018	10	15	B	cerana	N	N		1	Residential, foot of mountain
2無限今年 (2b)	Mrs Kudo	32.9619	129.78	Y		2	2019	6	25	B	cerana	N	N		1
2無限昨年 (2a)	Mrs Kudo	32.9619	129.78	Y		2	2019	5	11	B	cerana	P	N		1
3	Mr Terada	32.6324	129.8	N	500m diameter	5	2019	6	18	B	cerana	P	N		1	Secondary forest
4	Mrs Oshikata	33.3602	130.253	Y		8	2018	9	15	B	cerana	P	N		1	Riverside
5	Mr Shioya	33.2213	129.786	N	1000m diameter	3	2018	7	15	B	cerana	N	N		1	Paddy and crop
7	Mr Yamada	32.8064	129.884	N	200m diameter	7	2019	6	16	B	cerana	N	N		1	Forest	Hive established on 27.03.2019
8	Mr Yokota	33.3173	129.649	N	1000m diameter	16	2019	6	16	F	mellifera	N	N		1	Forest, paddy, crop
9	Mr and Mrs Kawano	32.8843	129.697	N	multiple sites	10	2018	6	5	B	cerana	P	N		At least 5
10	Mr Takahira	32.7316	129.923	N	500m diameter	10	2019	6	15	B	cerana	N	N		1	Forest, crop, Biwa orchard
11	Mr Yamaguchi	32.9425	129.685	Y		10	2019	6	17	B	cerana	P	N		1		Honey previously taken on 13.05.2019, so this sample was 2nd this season.
12	Mr Nagao	33.1775	129.953	N	multiple sites	7	2019	6	15	B	cerana	Mix	N		At least 6 within 3km
13	Mrs Jyoudai	32.8777	129.688	Y		10	2019	6	20	B	cerana	P	N		1	Orchard
14	Mrs Nakata	32.8483	129.7	N	200m diameter	2	2019	6	10	B	cerana	N	N		1	Forest, sml crop field	Hive established on 26.03.2019
山口さん市内(15 newest)	Mr Yamaguchi	32.7797	129.857	Y		10	2019	6	21	B	cerana	N	N		2
高岸さん今年(16b)	Mr Takagishi	33.0336	129.701	N	multiple sites	7	2019	6	6	B	cerana	Mix	N		At least 3
高岸さん昨年 (16a)	Mr Takagishi	33.0336	129.701	N	multiple sites	7	2018	6	15	B	cerana	Mix	N		At least 3
中山さん(17)	Mr Nakayama	32.9278	129.677	Y		6	2019	6	15	B	cerana	N*	Y	Sugar water to support move to new hive, Dec 2018	1		Hive split from population owned by Mr Yamaguchi in Dec 2018
												N = new in March/April (swarm caught or split from other hive), therefore very little honey from previous year (only that carried in stomachs).
												P = pre-existing hive but change of Queen possible. Therefore, some honey may be from previous year.
